# Supplementary material for: Completeness of reporting of randomised controlled trials including people with transient ischaemic attack or stroke: A systematic review
Source: Eur Stroke J. 2018 Jun 20;3(4):337–46. doi: 10.1177/2396987318782783 (PMC6571510; doi:10.1177/2396987318782783)
Supplement: Supplemental material for Completeness of reporting of randomised controlled trials including people with transient ischaemic attack or stroke: A systematic review [file Supplemental_material.xlsx]

## Sheet: Included papers
Title	Authors	Published Year	Journal	Volume	Issue	Study
A randomized, double-blind, vehicle-controlled trial of tirilazad mesylate in patients with aneurysmal subarachnoid hemorrhage: a cooperative study in north America	Haley Jr EC; Kassell NF; Apperson-Hansen C; Maile MH; Alves WM; The Participants	1997	Journal of Neurosurgery	86		HaleyJr 1997
CAST: randomised placebo-controlled trial of early aspirin use in 20000 patients with acute ischaemic stroke	CAST Collaborative Group	1997	Lancet	349		CASTCollaborativeGroup 1997
The international stroke trial (IST): a randomised trial of aspirin, subcutaneous heparin, both, or neither among 19435 patients with acute ischaemic stroke	International Stroke Trial Collaborative Group	1997	Lancet	349		InternationalStrokeTrialCollaborativeGroup 1997
Treatment of acute ischemic stroke with piracetam	de Deyn PP; de Reuck J; Deberdt W; Vlietinck R; Orgogozo J-M; For Members Of The Piracetam In Acute Stroke Study (PASS) Group	1997	Stroke	28		deDeyn 1997
Ebselen in acute ischemic stroke. A placebo-controlled, double blind clinical trial	Yamaguchi T; Sano K; Takakura K; Saito I; Shinohara Y; Asano T; Yasuhara H; For The Ebselen Study Group	1998	Stroke	29		Yamaguchi 1998
Low molecular weight heparinoid, org 10172 (danaparoid), and outcome after acute ischemic stroke	The Publications Committee of the Trial of Org 10172 in Acute Stroke Treatment (TOAST) Investigators	1998	Journal of the American Medical Association	279		ThePublicationsCommitteeoftheTrialofOrg10172inAcuteStrokeTreatment(TOAST)Investigators 1998
Streptokinase in acute stroke. Effect on reperfusion and recanalization	Yasaka M; O'Keefe GJ; Chambers BR; Davis SM; Infeld B; O'Malley H; Baird AE; Hirano T; Donnan GA	1998	Neurology	50		Yasaka 1998
Effects of hypertonic saline hydroxyethyl starch solution and mannitol in patients with increased intracranial pressure after stroke	Schwarz S; Schwab S; Bertram M; Aschoff A; Hacke W	1998	Stroke	29		Schwarz 1998
Effect of 5% albumin solution on sodium balance and blood volume after subarachnoid hemorrhage	Mayer SA; Solomon RA; Fink AE; Lennihan L; Stern L; Beckford A; Thomas CE; Klebanoff LM	1998	Neurosurgery	42		Mayer 1998
Clomethiazole acute stroke study (CLASS). Results of a randomized, controlled trial of clomethiazole versus placebo in 1360 acute stroke patients	Wahlgren NG; Ranasinha KW; Rosolacci T; Franke CL; van Erven PMM; Ashwood T; Claesson L; for the CLASS Study Group	1999	Stroke	30		Wahlgren 1999
Neuroprotective effect of an antioxidant, ebselen, in patients with delayed neurological deficits after aneurysmal subarachnoid hemorrhage	Saito I; Asano T; Sano K; Takakura K; Abe H; Yoshimoto T; Kikuchi H; Ohta T; Ishibashi S	1998	Neurosurgery	42		Saito 1998
Randomised double-blind placebo-controlled trial of thrombolytic therapy with intravenous alteplase in acute ischaemic stroke (ECASS II)	Hacke W; Kaste M; Fieschi C; von Kummer R; Davalos A; Meier D; Larrue V; Bluhmki E; Davis S; Donnan G; Schneider D; Diez-Tejedor E; Trouillas P; for the Second European-Australasian Acute Stroke Study Investigators	1998	Lancet	352		Hacke 1998
Effects of acupuncture treatment on daily life activities and quality of life. A controlled, prospective, and randomized study of acute stroke patients	Gosman-Hedstrom G; Claesson L; Klingenstierna U; Carlsson J; Olausson B; Frizell M; Fagerberg B; Blomstrand C	1998	Stroke	29		Gosman-Hedstrom 1998
Ruptured intracranial aneurysms: acute endovascular treatment with electrolytically detachable coils - a prospective randomized study	Vanninen R; Koivisto T; Saari T; Hernesniemi J; Vapalahti M	1999	Radiology	211		Vanninen 1999
Surgical treatment for intracerebral hemorrhage (STICH)	Morgenstern LB; Frankowski RF; Shedden P; Lasteur W; Grotta JC	1998	Neurology	51		Morgenstern 1998
A randomized efficacy trial of citicoline in patients with acute ischemic stroke	Clark WM; Williams BJ; Selzer KA; Zweifler RM; Sabounjian LA; Gammans RE; for the Citicholine Stroke Study Group	1999	Stroke	30		Clark 1999
Combined intravenous and intra-arterial r-TPA versus intra-arterial therapy of acute ischemic stroke. Emergency Management of Stroke (EMS) Bridging Trial	Lewandowski CA; Frankel M; Tomsick TA; Broderick J; Frey J; Clark W; Starkman S; Grotta J; Spilker J; Khoury J; Brott T; the EMS Bridging Trial Investigators	1999	Stroke	30		Lewandowski 1999
Early surgical treatment for supratentorial intracerebral hemorrhage. A randomized feasibility study	Zuccarello M; Brott T; Derex L; Kothari R; Sauerbeck L; Tew J; Van Loveren H; Yeh H-S; Tomsick T; Pancioli A; Khoury J; Broderick J	1999	Stroke	30		Zuccarello 1999
Effect of calcitonin on bone and connective tissue metabolism in hemiplegic patients: a two-year prospective study	Uebelhart D; Hartmann DJ; Barbezat S; Mermillod B; Chantraine A	1999	Clinical Rehabilitation	13		Uebelhart 1999
Cervene in acute ischemic stroke: results of a double-blind, placebo-controlled, dose-comparison study	Clark W; Ertag W; Orecchio E; Raps E	1999	Journal of Stroke and Cerebrovascular Diseases	8	4	Clark 1999
Neuroprotective effects of glycine for therapy of acute ischaemic stroke	Gusev EI; Skvortsova VI; Dambinova SA; Raevskiy KS; Alekseev AA; Bashkatova VG; Kovalenko AV; Kudrin VS; Yakovleva EV	2000	Cerebrovascular Diseases	10		Gusev 2000
Improved efficiency of hypervolemic therapy with inhibition of natriuresis by fludrocortisone in patients with aneurysmal subarachnoid hemorrhage	Mori T; Katayama Y; Kawamata T; Hirayama T	1999	Journal of Neurosurgery	91		Mori 1999
EMG-triggered electrical muscle stimulation in the treatment of central hemiparesis after a stroke	Heckmann J; Mokrusch T; Krockel A; Warnke S; von Stockert T; Neundorfer B	1997	European Journal of Physical Medicine and Rehabilitation	7		Heckmann 1997
Safety and pharmacokinetics of the neuroprotective drug Lubeluzole in patients with ischemic stroke	de Keyser J; van de Velde V; Schellens RLLA; Hantson L; Tritsmans L; Gheuens J; van Peer A; Woestenborghs R; Franke CL; van Gorp J	1997	Clinical Therapeutics	19	6	deKeyser 1997
Double-blind, randomized, vehicle-controlled study of high-dose tirilazad mesylate in women with aneurysmal subarachnoid hemorrhage. Part I. A cooperative study in Europe, Australia, New Zealand, and South Africa	Lanzino G; Kassell NF; Dorsch NWC; Pasqualin A; Brandt L; Schmiedek P; Truskowski LL; Alves WM; and the participants	1999	Journal of Neurosurgery	90		Lanzino 1999
Double-blind, randomized, vehicle-controlled study of high-dose tirilazad mesylate in women with aneurysmal subarachnoid hemorrhage. Part II. A cooperative study in North America	Lanzino G; Kassell NF; and the participants	1999	Journal of Neurosurgery	90		Lanzino 1999
Comparative efficacies of a calcium antagonist and an alpha 1 blocker in elderly hypertensive patients with stroke	Setoguchi M; Onaka U; Abe I; Hasuo Y; Nishino Y; Fujishima M	1998	Clinical and Experimental Hypertension	20	7	Setoguchi 1998
A study on the efficacy of intraventricular urokinase in the treatment of intraventricular haemorrhage	Tung MYY; Ong PL; Seow WT; Tan KK	1998	British Journal of Neurosurgery	12	3	TungMYY 1998
Abciximab in acute ischemic stroke. A randomized, double-blind, placebo-controlled, dose escalation study	The Abciximab in Ischemic Stroke Investigators	2000	Stroke	31		TheAbciximabinIschemicStrokeInvestigators 2000
Low molecular-weight heparin versus aspirin in patients with acute ischaemic stroke and atrial fibrillation: a double-blind randomised study	Berge E; Abdelnoor M; Nakstad PH; Sandset PM; on behalf of the HAEST Study Group	2000	Lancet	355		Berge 2000
Use of Factor IX complex in warfarin-related intracranial hemorrhage	Boulis NM; Bobek MP; Schmaier A; Hoff JT	1999	Neurosurgery	45	5	Boulis 1999
Cervene (Nalmefene) in acute ischemic stroke. Final results of a Phase III Efficacy Study	Clark WM; Raps EC; Tong DC; Kelly RE; for the Cervene Stroke Study Investigators	2000	Stroke	31		Clark 2000
The rtPA (Alteplase) 0- to 6-hour acute stroke trial Part A (A0276g). Results of a double-blind, placebo-controlled, multicenter study	Clark WM; Albers GW; Madden KP; Hamilton S; for the Thrombolytic Therapy in Acute Ischemic Stroke Study Investigators	2000	Stroke	31		Clark 2000
Selfotel in acute ischemic stroke. Possible neurotoxic effects of an NMDA antagonist	Davis SM; Lees KR; Albers GW; Diener HC; Markabi S; Karlsson G; Norris J; for the ASSIST Investigators	2000	Stroke	31		Davis 2000
Phase II Studies of the glycine antagonist GV150526 in acute stroke. The North American Experience	The North American Glycine Antagonist in Neuroprotection (GAIN) Investigators	2000	Stroke	31		TheNorthAmericanGlycineAntagonistinNeuroprotection(GAIN)Investigators 2000
Randomized pilot trial of postoperative aspirin in subarachnoid hemorrhage	Hop JW; Rinkel GJE; Algra A; Berkelbach van der Sprenkel JW; van Gijn J	2000	Neurology	54		Hop 2000
Effect of hypervolemic therapy on cerebral blood flow after subarachnoid hemorrhage. A randomized controlled trial	Lennihan L; Mayer SA; Fink ME; Beckford A; Paik MC; Zhang H; Wu Y-C; Klebanoff LM; Raps EC; Solomon RA	2000	Stroke	31		Lennihan 2000
Treatment of intraventricular hemorrhage with urokinase. Effects on 30-day survival	Naff NJ; Carhuapoma JR; Williams MA; Bhardwaj A; Ulatowski JA; Bederson J; Bullock R; Schmutzhard E; Pfausler B; Keyl PM; Tuhrim S; Hanley DF	2000	Stroke	31		Naff 2000
Antifibrinolytic treatment in subarachnoid hemorrhage. A randomized placebo-controlled trial	Roos Y; for the STAR Study Group	2000	Neurology	54		Roos 2000
Evaluation of the benefits of monitoring fluid thickness in the dietary management of dysphagic stroke patients	Goulding R; Bakheit AMO	2000	Clinical Rehabilitation	14		Goulding 2000
Outcomes of early endovascular versus surgical treatment of ruptured cerebral aneurysms	Koivisto T; Vanninen R; Hurskainen H; Saari T; Hernesniemi J; Vapalahti M	2000	Stroke	31		Koivisto 2000
Lubeluzole in acute ischemic stroke treatment. A double-blind study with an 8-hour inclusion window comparing a 10-mg daily dose of lubeluzole with placebo	Diener HC; Cortens M; Ford G; Grotta J; Hacke W; Kaste M; Koudstaal PJ; Wessel T; on behalf of the LUB-INT-13 Investigators	2000	Stroke	31		Diener 2000
Piracetam improves activated blood flow and facilitates rehabilitation of poststroke aphasic patients	Kessler J; Thiel A; Karbe H; Heiss WD	2000	Stroke	31		Kessler 2000
Glycine antagonist (gavestinel) in neuroprotection (GAIN International) in patients with acute stroke: a randomised controlled trial	Lees KR; Asplund K; Carolei A; Davis SM; Diener H-C; Kaste M; Orgogozo J-M; Whitehead J; for the GAIN International Investigators	2000	Lancet	355		Lees 2000
Effects of nonsteroidal anti-inflammatory drugs on hemostasis in patients with aneurysmal subarachnoid hemorrhage	Niemi T; Tanskanen P; Taxell C; Juvela S; Randell T; Rosenberg P	1999	Journal of Neurosurgical Anesthesiology	11	3	Niemi 1999
Influence of electric scalp acupuncture on blood apolipoprotein in patients of stroke: a prospective randomized trial on 183 patients	Jiang Z-Y; Li Y-K; Hu K-M; Li C-D; Wang S-M; Wu J	1998	International Journal of Clinical Acupuncture	9	1	JiangZ-Y 1998
The Clomethiazole Acute Stroke Study in Hemorrhagic Stroke (CLASS-H): Final results	Lyden PD; Shuaib A; Ng K; Atkinson R; Ashwood T; Nordlund A; Odergren T; on behalf of the CLASS-IHT Investigators	2000	Journal of Stroke and Cerebrovascular Diseases	9	6	Lyden 2000
Treatment of acute cerebral infarction with arginine esterase: a controlled study with heparin	Kim JS; Yoon SS; Kwon SU; Ha JH; Suh EJ; Chi HS	2001	Cerebrovascular Diseases	11		Kim 2001
Pharmacokinetics of a glycine site antagonist (gavestinel) following multiple dosing in patients with acute stroke	Hoke JF; Dyker AG; Barnaby RJ; Less KR	2000	European Journal of Clinical Pharmacology	55		Hoke 2000
Effect of citicoline on ischemic lesions as measured by diffusion-weighted magnetic resonance imaging	Warach S; Creed Pettigrew L; Dashe JF; Pullicino P; Lefkowitz DM; Sabounjian L et al	2000	Annals of Neurology	48		Warach 2000
Acetaminophen for altering body temperature in acute stroke. A randomized clinical trial	Kasner SE; Wein T; Piriyawat P; Viller-Cordova CE; Chalela JA; Krieger DW et al	2002	Stroke	33		Kasner 2002
Does acupuncture have additional value to standard poststroke motor rehabilitation	Sze FK-H; Wong E; Yi X; Woo J	2002	Stroke	33		SzeFK-H 2002
Efficacy and safety of the endothelinA/B receptor antagonist TAK-044 in treating subarachnoid hemorrhage: a report by the steering committee on behalf of the UK/Netherlands/Eire TAK-044 subarachnoid haemorrhage study group	Shaw MDM; Vermeulen M; Murray GD; Pickard JD; Bell A; Teasdale GM	2000	Journal of Neurosurgery	93		ShawMDM 2000
Intraoperative mild hypothermia ameliorates postoperative cerebral blood flow impairment in patients with aneurysmal subarachnoid hemorrhage	Karibe H; Sato K; Shimizu H; Tominaga T; Koshu K; Yoshimoto T	2000	Neurosurgery	47	3	Karibe 2000
Lipid peroxide, beta-carotene and alpha-tocopherol in ischaemic stroke and effect of exogenous vitamin E supplementation on outcome	Daga MK; Mishra TK	1997	Journal of the Association of Physicians of India	45	11	Daga 1997
MR spectroscopy study of dichloroacetate treatment after ischemic stroke	Graham GD; Barker PB; Brooks WM; Morris DC; Ahmed W; Bryniarski E; Hearshen DO; Sanders JA; Holshouser BA; Turkel CC	2000	Neurology	55		Graham 2000
Effect of aspirin and ticlopidine, alone or combined, on platelet aggregation in acute ischaemic stroke	Singh P; Kar AM; Nag D; Misra A; Shukla R; Agarwal A; Gaur SPS	1999	Journal of Internal Medicine of India	2	4	Singh 1999
Use of anti-ICAM-1 therapy in ischemic stroke: results of the enlimomab acute stroke trial	Enlimomab Acute Stroke Trial Investigators	2001	Neurology	57		EnlimomabAcuteStrokeTrialInvestigators 2001
Prophylactic hyperdynamic postoperative fluid therapy after aneurysmal subarachnoid hemorrhage: a clinical, prospective, randomized, controlled study	Egge A; Waterloo K; Sjoholm H; Solberg T; Ingebrigtsen T; Romner B	2001	Neurosurgery	49		Egge 2001
Improvement of outcome in patients with acute ischaemic stroke treated with fragmin	Dan G-A; Gonta A; Serbanescu A; Ionete C	2000	Haemostasis	30	Suppl 2	DanG-A 2000
Hyperbaric oxygen therapy in acute ischemic stroke. Results of the hyperbaric oxygen in acute ischemic stroke trial pilot study	Rusyniak DE; Kirk MA; May JD; Kao LW; Brizendine EJ; Welch JL; Cordell WH; Alonso RJ	2003	Stroke	34		Rusyniak 2003
Admitting acute ischemic stroke patients to a stroke care monitoring unit versus a conventional stroke unit. A randomized pilot study	Sulter G; Elting JW; Langedijk M; Maurits NM; De Keyser J	2003	Stroke	34		Sulter 2003
Early versus delayed carotid endarterectomy after a nondisabling ischemic stroke: a prospective randomized study	Ballotta E; Da Giau G; Baracchini C; Abbruzzese E; Saladini M; Meneghetti G	2002	Surgery	131		Ballotta 2002
Comparison of short (3-day) hospitalization followed by home care treatment and conventional (10-day) hospitalization for acute ischemic stroke	Suwanwela NC; Phanthumchinda K; Limtongkul S; Suvanprakorn P	2002	Cerebrovascular Diseases	13		Suwanwela 2002
Pioglitazone improves insulin sensitivity among nondiabetic patients with a recent transient ischemic attack or ischemic stroke	Kernen WN; Inzucchi SE; Viscoli CM; Brass LM; Bravata DM; Shulman GI; McVeety JC; Horwitz RI	2003	Stroke	34		Kernen 2003
The ACCESS Study. Evaluation of acute Candesartan Cilexetil therapy in stroke survivors	Schrader J; Luders S; Kulschewski A; Berger J; Zidek W; Treib J; Einhaupl; Diener HC; Dominiak P; on behalf of the ACCESS Study Group	2003	Stroke	34		Schrader 2003
Effect of nimodipine on the outcome of patients after aneurysm surgery	Islekel S; Oktar N; Yurtseven T; Ozdamar N	1999	Journal of Neurological Sciences (Turkish)	16	1	Islekel 1999
Effect on cerebral vasospasm of coil embolization followed by microcatheter intrathecal urokinase infusion into the cisterna magna. A prospective randomized study	Hamada J; Kai Y; Morioka M; Yano S; Mizuno T; Hirano T; Kazekawa K; Ushio Y	2003	Stroke	34		Hamada 2003
Prophylactic management of excessive natriuresis with hydrocortisone for efficient hypervolemic therapy after subarachnoid hemorrhage	Moro N; Katayama Y; Kojima J; Mori T; Kawamata T	2003	Stroke	34		Moro 2003
Measuring caffeine-induced changes in middle cerebral artery blood velocity using transcranial Doppler in patients recovering from ischaemic stroke	Lunt MJ; Hanrahan A; Kerr D; Jenkinson DF	2002	Physiological Measurement	23		Lunt 2002
A randomized trial on the efficacy of intensive rehabilitation in the acute phase of ischemic stroke	Di Lauro A; Pellegrino L; Savastano G; Ferraro C; Fusco M; Balzarano F; Franco MM; Biancardi LG; Grasso A	2003	Journal of Neurology	250		DiLauro 2003
Recombinant activated Factor VII for acute intracerebral hemorrhage	Mayer SA; Brun NC; Begtrup K; Broderick J; Davis S; Diringer MN; et al	2005	New England Journal of Medicine	352		Mayer 2005
Effect of perindopril on cerebral and renal perfusion on normotensives in mild early ischaemic stroke: a randomized controlled trial	Nazir FS; Overell JR; Bolster A; Hilditch TE; Lees KR	2005	Cerebrovascular Diseases	19		Nazir 2005
Emergency administration of abciximab for treatment of patients with acute ischemic stroke. Results of a randomized phase 2 trial	Abciximab Emergent Stroke Treatment Trial (AbESTT) Investigators	2005	Stroke	36		AbciximabEmergentStrokeTreatmentTrial(AbESTT)Investigators 2005
The Early Systemic Prophylaxis of Infection After Stroke Study. A randomized clinical trial	Chamorro A; Horcajada JP; Obach V; Vargas M; Revilla M; Torres F; Cervera A; Planas AM; Mensa J	2005	Stroke	36		Chamorro 2005
Reduction of ischemic sequelae following spontaneous subarachnoid hemorrhage: a double-blind, randomized comparison of enoxaparin versus placebo	Wurm G; Tomancok B; Nussbaumer K; Adelwohrer C; Holl K	2004	Clinical Neurology and Neurosurgery	106		Wurm 2004
Early assessment by a mobile stroke team: a randomised controlled trial	Dey P; Woodman M; Gibbs A; Steele R; Stocks SJ; Wagstaff S; et al	2005	Age and Ageing	34		Dey 2005
Effects of acute treatment with pravastatin on cerebral vasospasm, autoregulation, and delayed ischemic deficits after aneurysmal subarachnoid hemorrhage. A phase II randomized placebo-controlled trial	Tseng M-Y; Czosnyka M; Richards H; Rickard JD; Kirkpatrick PJ	2005	Stroke	36		TsengM-Y 2005
Impact of stereotactic hemotoma evacuation on activities of daily living during the chronic period following spontaneous putaminal hemorrhage: a randomized study	Hattori N; Katayama Y; Maya Y; Gatherer A	2004	Journal of Neurosurgery	101		Hattori 2004
No effect of enoxaparin on outcome of aneurysmal subarachnoid hemorrhage: a randomized, double-blind, placebo-controlled clinical trial	Siironen J; Juvela S; Varis J; Porras M; Poussa K; Ilveskero S; et al	2003	Journal of Neurosurgery	99		Siironen 2003
Intravenous heparin started within the first 3 hours after onset of symptoms as a treatment for acute nonlacunar hemispheric cerebral infarctions	Camerlingo M; Salvi P; Belloni G; Gamba T; Cesana BM; Mamoli A	2005	Stroke	36		Camerlingo 2005
A randomized controlled trial of supervised versus unsupervised exercise programs for ambulatory stroke survivors	Olney SJ; Nymark J; Brouwer B; Culham E; Day A; Heard J; et al	2006	Stroke	37		Olney 2006
Clazosentan (AXV-034343), a selective endothelin A receptor antagonist, in the prevention of cerebral vasospasm following severe aneurysmal subarachnoid hemorrhage: results of a randomized, double-blind, placebo-controlled, multicenter phase IIa study	Vajkoczy P; Meyer B; Weidauer S; Raabe A; Thome C; Ringel F; et al	2005	Journal of Neurosurgery	103		Vajkoczy 2005
Sonothrombolysis in acute ischemic stroke for patients ineligible for rt-PA	Eggers J; Seidel G; Koch B; Konig IR	2005	Neurology	64		Eggers 2005
Effects of stimulating cerebellar fastigial nucleus on internal diameter of brachial artery in the elderly with transient ischemic attack	Li CP; Tu L; Liu XQ; Shen YN	2005	Chinese Journal of Clinical Rehabilitation	9	13	Li 2005
Randomized controlled trial of acetylsalicylic acid in aneurysmal subarachnoid hemorrhage. The MASH study	van den Bergh WM	2006	Stroke	37		vandenBergh 2006
Motor relearning programme for stroke patients: a randomized controlled trial	Chan DYL; Chan CCH; Au DKS	2006	Clinical Rehabilitation	20		ChanDYL 2006
Effect of nicardipine prolonged-release implants on cerebral vasospasm and clinical outcome after severe aneurysmal subarachnoid hemorrhage. A prospective randomized double-blind phase IIa study	Barth M; Capelle HH; Weidauer S; Weiss C; Munch E; Thome C; et al	2007	Stroke	38		Barth 2007
Effect of the glycine antagonist gavestinel on cerebral infarcts in acute stroke patients, a randomized placebo-controlled trial: the GAIN MRI substudy	Warach S; Kaufman D; Chiu D; Devlin T; Luby M; Rashid A; et al	2006	Cerebrovascular Diseases	21		Warach 2006
Citicoline in intracerebral haemorrhage: a double-blind randomized placebo-controlled multi-centre pilot study	Secades JJ; Alvarez-Sabin J; Rubio F; Lozano R; Davalos A; Castillo J	2006	Cerebrovascular Diseases	21		Secades 2006
Effects of an individualized multimedia computer program for health education in patients with a recent minor stroke or transient ischemic attack - a randomized controlled trial	Maasland E; Koudstaal PJ; Habbema JDF; Dippel DWJ	2007	Acta Neurologica Scandinavica	115		Maasland 2007
Effect of antidepressant therapy on executive function after stroke	Narushima K; Paradiso S; Moser DJ; Jorge R; Robinson RG	2007	British Journal of Psychiatry	190		Narushima 2007
Low molecular weight heparin compared with aspirin for the treatment of acute ischaemic stroke in Asian patients with large artery occlusive disease: a randomised study	Wong KS; Chen C; Ng PW; Tsoi TH; Li HL; Fong WC; et al	2007	Lancet Neurology	6		Wong 2007
A pilot study of dual treatment with recombinant tissue plasminogen activator and uric acid in acute ischemic stroke	Amaro S; Soy D; Obach V; Cervera A; Planas AM; Chamorro A	2007	Stroke	38		Amaro 2007
Endoscopic surgery for spontaneous basal ganglia hemorrhage: comparing endoscopic surgery, stereotactic aspiration, and craniotomy in noncomatose patients	Cho DY; Chen CC; Chang CS; Lee WY; Tso M	2006	Surgical Neurology	65		Cho 2006
Efficacy and safety of recombinant activated Factor VII for acute intracerebral hemorrhage	Mayer SA; Brun NC; Begtrup K; Broderick J; Davis S; Diringer MN; Skolnick BE; Steiner T	2008	New England Journal of Medicine	358	20	Mayer 2008
Effect of prophylactic transluminal balloon angioplasty on cerebral vasospasm and outcome in patients with Fisher Grade III subarachnoid hemorrhage. Results of a phase II multicenter randomized clinical trial	Zwienenberg-Lee M; Hartman J; Rudisill N; Madden LK; Smith K; Eskridge J; et al	2008	Stroke	39		Zwienenberg-Lee 2008
An Emergency Department Diagnostic Protocol for Patients With Transient Ischemic Attack: A Randomized Controlled Trial	Ross MA; Compton S; Medado P; Fitzgerald M; Kilanowski P; O'Neil BJ	2007	Annals of Emergency Medicine	50	2	Ross 2007
Thrombolysis with alteplase 3 to 4.5 hours after ischemic stroke	Hacke W; Kaste M; Bluhmki E; Brozman M; Davalos A; Guidetti D; et al	2008	New England Journal of Medicine	359		Hacke 2008
A pilot study on systemic thrombolysis followed by low molecular weight heparin in ischemic stroke	Mikulik R; Dufek M; Goldemund D; Reif M	2006	European Journal of Neurology	13		Mikulik 2006
Intensive blood pressure reduction in acute cerebral haemorrhage trial (INTERACT): a randomised pilot trial	Anderson CS; Huang Y; Wang JG; Arima H; Neal B; Peng B; et al	2008	Lancet Neurology	7		Anderson 2008
Cilostazol as an alternative to aspirin after ischaemic stroke: a randomised, double-blind, pilot study	Huang Y; Cheng Y; Wu J; Li Y; Xu E; Hong Z; et al	2008	Lancet Neurology	7		Huang 2008
Clazosentan to Overcome Neurological Ischemia and Infarction Occurring After Subarachnoid Hemorrhage (CONSCIOUS-1). Randomized, Double-Blind, Placebo-Controlled Phase 2 Dose-Finding Trial	Macdonald RL; Kassell NF; Mayer S; Ruefenacht D; Schmiedek P; Weidauer S; et al	2008	Stroke	39		Macdonald 2008
Effects of intraoperative hypothermia on neuropsychological outcomes after intracranial aneurysm surgery	Anderson SW; Todd MM; Hindman BJ; Clarke WR; Torner JC; Tranel D; Yoo B; Weeks J; Manzel KW; Samra S	2006	Annals of Neurology	60		Anderson 2006
Hypertonic saline (7.2%) in 6% hydroxyethyl starch reduces intracranial pressure and improves hemodynamics in a placebo-controlled study involving stable patients with subarachnoid hemorrhage	Bentsen G; Breivik H; Lundar T; Stubhaug A	2006	Critical Care Medicine	34	12	Bentsen 2006
Randomized, Placebo-Controlled, Dose-Ranging Clinical Trial of Intravenous Microplasmin in Patients With Acute Ischemic Stroke	Thijs VNS; Peeters A; Vosko M; Aichner F; Schellinger PD; Schneider D; et al	2009	Stroke	40		ThijsVNS 2009
Clinical Studies on Cerebral Infarction Treated with Acupuncture at Acupoints of Governor Meridian	Xu N; Zhang W; Liang X	1997	World Journal of Acupuncture and Moxibustion	7	3	Xu 1997
Respiratory muscle training improves cardiopulmonary function and exercise tolerance in subjects with subacute stroke: a randomized controlled trial	Sutbeyaz ST; Koseoglu F; Inan K; Coskun O	2010	Clinical Rehabilitation	24		Sutbeyaz 2010
Long-term effect of repetitive transcranial magnetic stimulation on motor function recovery after acute ischemic stroke	Khedr EM; Etraby AE; Hemeda M; Nasef AM; Razek AAE	2010	Acta Neurologica Scandinavica	121		Khedr 2010
Auto-Titrating Continuous Positive Airway Pressure for Patients With Acute Transient Ischemic Attack. A Randomized Feasibility Trial	Bravata DM; Concato J; Fried T; Ranjbar N; Sadarangani T; McClain V; et al	2010	Stroke	41		Bravata 2010
Effects of antihypertensive treatment after acute stroke in the Continue Or Stop post-Stroke Antihypertensives Collaborative Study (COSSACS): a prospective, randomised, open, blinded-endpoint trial	Robinson TG; Potter JF; Ford GA; Bulpitt CJ; Chernova J; Jagger C; James MA; Knight J; Markus HS; Mistri AK; Poulter NR	2010	Lancet Neurology	9		Robinson 2010
A controlled trial of nimodipine in acute ischemic stroke. A multicenter Indonesian Neurological Association study group	Lamsudin R; et al	1997	Indonesian Journal of Clinical Epidemiology and Biostatistics	4	2	Lamsudin 1997
Nicergoline Increases Serum Substance P Levels in Patients with an Ischaemic Stroke	Nishiyama Y; Abea A; Ueda M; Katsura K; Katayama Y	2010	Cerebrovascular Diseases	29		Nishiyama 2010
Randomized, double-blind, placebo-controlled, pilot trial of high-dose methylprednisolone in aneurysmal subarachnoid hemorrhage	Gomis P; Graftieaux JP; Sercombe R; Hettler D; Scherpereel B; Rousseaux P	2010	Journal of Neurosurgery	112		Gomis 2010
AXIS. A Trial of Intravenous Granulocyte Colony-Stimulating Factor in Acute Ischemic Stroke	Schabitz WR; Laage R; Vogt G; Koch W; Kollmar R; Schwab S; et al	2010	Stroke	41		Schabitz 2010
Comparison of the effect of etomidate and desflurane on brain tissue gases and pH during prolonged middle cerebral artery occlusion	Hoffman WE; Charbel FT; Edelman G; Misra M; Ausman JI	1998	Anesthesiology	88		Hoffman 1998
Clazosentan, an endothelin receptor antagonist, in patients with aneurysmal subarachnoid haemorrhage undergoing surgical clipping: a randomised, double-blind, placebo-controlled phase 3 trial (CONSCIOUS-2)	Macdonald RL; Higashida RT; Keller E; Mayer SA; Molyneux A; Raabe A; et al	2011	Lancet Neurology	10		Macdonald 2011
Single dose of fluoxetine increases muscle activation in chronic stroke patients	Berends HI; Nijlant JMM; van Putten MJAM; Movig KLL; IJzerman MJ;	2009	Clinical Neuropharmacology	32	1	Berends 2009
Intravenous insulin therapy in the maintenance of strict glycemic control in nondiabetic acute stroke patients with mild hyperglycemia	Staszewski J; Brodacki B; Kotowicz J; Stepien A	2011	Journal of Stroke and Cerebrovascular Diseases	20	2	Staszewski 2011
The effects of antiplatelet agents on platelet-leukocyte aggregations in patients with acute cerebral infarction	Cao YJ; Wang YM; Zhang J; Zeng YJ; Liu CF	2009	Journal of Thrombosis and Thrombolysis	27		Cao 2009
A randomized placebo controlled trial of early treatment of acute ischemic stroke with atorvastatin and irbesartan	Beer C; Blacker D; Bynevelt M; Hankey GJ; Puddey IB	2012	International Journal of Stroke	7		Beer 2012
Lumbar Drainage of Cerebrospinal Fluid After Aneurysmal Subarachnoid Hemorrhage	Al-Tamimi YZ; Bhargava D; Feltblower RG; Hall G; Goddard AJP; Quinn AC; Ross SA	2012	Stroke	43		Al-Tamimi 2012
Magnesium for aneurysmal subarachnoid haemorrhage (MASH-2): a randomised placebo-controlled trial	Dorhout Mees SM; Algra A; Vandertop WP; van Kooten F; Kuijsten HAJM; Boiten J; et al	2012	Lancet	380		DorhoutMees 2012
A randomized and blinded single-center trial comparing the effect of intracranial pressure and intracranial pressure wave amplitude-guided intensive care management on early clinical state and 12-month outcome in patients with aneurysmal subarachnoid hemorrhage	Eide PK; Bentsen G; Sorteberg AG; Marthinsen PB; Stubhaug A; Sorteberg W	2011	Neurosurgery	69	5	Eide 2011
The benefits and harms of intravenous thrombolysis with recombinant tissue plasminogen activator within 6h of acuye ischaemic stroke (the third international stroke trial [IST-3]): a randomised controlled trial	The IST-3 Collaborative Group	2012	Lancet	379		TheIST-3CollaborativeGroup 2012
Magnesium sulfate therapy for cerebral vasospasm after aneursymal subarachnoid hemorrhage	Akdemir H; Kulaksizoglu EO; Tucer B; Menku A; Postalci L; Gunaldi O	2009	Neurosurgery Quarterly	19	1	Akdemir 2009
Optimal dosing of intravenous unfractionated heparin bolus in transient ischemic attack or stroke	Kang K; Kim DW; Park H-K; Yoon B-W	2010	Clinical and Applied Thrombosis/Hemostasis	16	2	Kang 2010
Effects of Aggrenox and aspirin on plasma endothelial nitric oxide synthase and oxidised low-density lipoproteins in patients after ischaemic stroke. The AGgrenox versus Aspirin Therapy Evaluation (AGATE) Biomarker Substudy	Serebruany V; Sani Y; Eisert C; Schevchuck A; Fong A; Hanley D	2011	Thrombosis and Haemostasis	105		Serebruany 2011
Effects of a short-acting B1 receptor antagonist landiolol on hemodynamics and tissue injury markers in patients with subarachnoid hemorrhage undergoing intracranial aneurysm surgery	Kawaguchi M; Utada K; Yoshitani K; Uchino H; Takeda Y; Masui K; et al	2010	Journal of Neurosurgical Anesthesiology	22	3	Kawaguchi 2010
Efficacy and safety of cerebrolysin in patients with hemorrhagic stroke	Bajenaru O; Tiu C; Moessler H; Antochi F; Muresanu D; Popescu BO; et al	2010	Journal of Medicine and Life	3	2	Bajenaru 2010
Effect of repetitive arm cycling following botulinum toxin injection for poststroke spasticity: evidence from fMRI	Diserens K; Ruegg D; Kleiser R; Hyde S; Perret N; Vuadens P; et al	2010	Neurorehabilitation and Neural Repair	24	8	Diserens 2010
RCT: self-regulated exercise program in transient ischemic attack and minor stroke patients	Chanruengvancih W; Kasemkitwattana S; Charoenyooth C; Towanabut S; Pongurgsorn C	2006	Thai Journal of Nursing Research	10	3	Chanruengvancih 2006
Hydrocoil endovascular aneurysm occlusion and packing study (HELPS trial): procedural safety and operator-assessed efficacy results	White PM; Lewis SC; Nahser H; Sellar RJ; Goddard T; Gholkar A	2008	American Journal of Neuroradiology	29		White 2008
Even in patients with a small haemorrhagic volume, stereotactic-guided evacuation of spontaneous intracerebral hemorrhage improves functional outcome	Kim YZ; Kim KH	2009	Journal of the Korean Neurosurgical Society	46		Kim 2009
Prospective, randomized, open-label phase II trial on concomitant intraventricular fibrinolysis and low-frequency rotation after severe subarachnoid haemorrhage	Etminan N; Beseoglu K; Eicker SO; Turowski B; Steiger H-J; Hanggi D	2013	Stroke	44		Etminan 2013
Effect of IMOD on the inflammatory process after acute ischemic stroke: a randomized clinical trial	Farhoudi M; Najafi-Nesheli M; Hashemilar M; Mahmoodpoor A; Sharifipour E; Baradaran B; et al	2013	DARU Journal of Pharmaceutical Sciences	21		Farhoudi 2013
A randomized controlled trial of prophylactic intra-aortic balloon counterpulsation in high-risk aneurysmal subarachnoid hemorrhage	Bulters DO; Birch AA; Hickey E; Tatlow I; Sumner K; Lamb R; Lang D	2013	Stroke	44		Bulters 2013
Testing the effectiveness of knowledge and behavior therapy in patients of hemiplegic stroke	Chang K; Zhang H; Xia Y; Chen C	2011	Topics in Stroke Rehabilitation	18	5	Chang 2011
Effect of aerobic exercise (walking) training on functional status and health-related quality of life in chronic stroke survivors. A randomized controlled trial	Gordon CD; Wilks R; McCaw-Binns A	2013	Stroke	44		Gordon 2013
Minimally invasive surgery plus recombinant tissue-type plasminogen activator for intracerebral hemorrhage evaluation decreases perihematomal edema	Mould WA; Carhuapoma JR; Muschelli J; Lane K; Morgan TC; McBee NA; et al	2013	Stroke	44		Mould 2013
The Intracerebral Hemorrahge Acutely Decreasing Arterial Pressure Trial	Butcher KS; Jeerakathil T; Hill M; Demchuk AM; Dowlatshahi D; Coutts SB; et al	2013	Stroke	44		Butcher 2013
Early surgery versus initial conservative treatment in patients with spontaneous supratentorial lobar intracerebral haematomas (STICH II): a randomised trial	Mendelow AD; Gregson BA; Rowan EN; Murray GD; Gholkar A; Mitchell PM; et al	2013	Lancet	382		Mendelow 2013
High-dose albumin treatment for acute ischaemic stroke (ALIAS) part 2: a randomised, double-blind, phase 3, placebo-controlled trial	Ginsberg MD; Palesch Y; Hill MD; Martin RH; Moy CS; Barsan WG; et al	2013	Lancet Neurology	12		Ginsberg 2013
Randomised controlled trial of an education and support package for stroke patients and their carers	Eames S; Hoffmann T; Worrall L; Read S; Wong A	2013	BMJ Open	3		Eames 2013
Effect of acetylsalicylic acid usage and platelet transfusion on postoperative hemorrhage and activities of daily living in patients with acute intracerebral hemorrhage	Li X; Sun Z; Zhao W; Zhang J; Chen J; Li Y; et al	2013	Journal of Neurosurgery	118		Li 2013
Noninvasive cardiac event monitoring to detect atrial fibrillation after ischemic stroke. A randomized, controlled trial	Higgins P; MacFarlane PW; Dawson J; McInnes GT; Langhorne P; Lees KR	2013	Stroke	44		Higgins 2013
Long-lasting effects of a new memory self-efficacy training for stroke patients: a randomized controlled trial	Aben L; Heijenbrok-Kal MH; Ponds RWHM; Busschbach JJV; Ribbers GM	2014	Neurorehabilitation and Neural Repair	28	3	Aben 2014
Randomized, double-blind trial of the effect of fluid composition on electrolyte, acid-base, and fluid homeostasis in patients early after subarachnoid hemorrhage	Lehmann L; Bendel S; Uehlinger DE; Takala J; Schafer M; Reinert M; Jakob SM	2013	Neurocritical Care	18		Lehmann 2013
Early intensive versus minimally invasive approach to postoperative hemodynamic management after subarachnoid haemorrhage	Mutoh T; Kazumata K; Terasaka S; Taki Y; Suzuki A; Ishikawa T	2014	Stroke	45		Mutoh 2014
A prospective, randomized, single-blinded trial on the effect of early rehabilitation on daily activities and motor function of patients with hemorrhagic stroke	Bai Y; Hu Y; Wu Y; Zhu Y; He Q; Jiang C; et al	2012	Journal of Clinical Neuroscience	19		Bai 2012
Efficacy of early intervention of motor relearning program on post-stroke hemiplegia: a randomized controlled observation	Xue J; Bai L; Guo QR; Yang CR; Lu J	2006	Neural Regeneration Research	1	3	Xue 2006
Long-term three-stage rehabilitation intervention alleviates spasticity of the elbows, fingers, and plantar flexors and improves activities of daily living in ischemic stroke patients: a randomized, controlled trial	Bai Y; Hu Y; Wu Y; Zhu Y; Zhang B; Jiang C; et al	2014	Neuroreport	25		Bai 2014
Prehospital use of magnesium sulfate as neuroprotection in acute stroke	Saver JL; Starkman S; Eckstein M; Stratton SJ; Pratt FD; Hamilton S; et al	2015	New England Journal of Medicine	372		Saver 2015
Effects of batroxobin with continuous transcranial Doppler monitoring in patients with acute cerebral stroke: a randomized controlled trial	He Y; Ma K; Tang B; Fu X; Zhan Y; Cai Z; et al	2014	Echocardiography	31		He 2014
Acupuncture efficacy on ischemic stroke recovery. Multicenter randomized controlled trial in China	Zhang S; Wu B; Liu M; Li N; Zeng X; Liu H; et al	2015	Stroke	46		Zhang 2015
A randomized trial of intraarterial treatment for acute ischemic stroke	Berkhemer OA; Fransen PS; Beumer D; van den Berg LA; Lingsma HF; Yoo AJ; et al	2015	New England Journal of Medicine	372	1	Berkhemer 2015
Safety and feasibiLIty of Metformin in patients with Impaired glucose Tolerance and a recent TIA or minor ischemic stroke (LIMIT) trial - a multicenter, randomized, open-label phase II trial	den Hertog HM; Vermeer SE; Zandbergen AA; Achterberg S; Dippel DW; Algra A; et al	2015	International Journal of Stroke	10		denHertog 2015
High-dose simvastatin for aneurysmal subarachnoid hemorrhage. Multicenter randomized controlled double-blinded clinical trial	Wong GKC; Chan DYC; Siu DYW; Zee BCY; Poon WS; Chan MTV; et al	2015	Stroke	46		WongGKC 2015
Effects of prostacyclin on cerebral blood flow and vasospasm after subarachnoid hemorrhage. Randomized, pilot trial	Rasmussen R; Wetterslev J; Stavngaard T; Juhler M; Skjoth-Rasmussen J; Grande PO; et al	2015	Stroke	46		Rasmussen 2015
A randomised controlled trial of induced hypermagnesaemia following aneurysmal subarachnoid haemorrhage	Bradford CM; Finfer S; O'Connor A; Yarad E; Firth R; McCallister R; et al	2013	Critical Care and Resuscitation	15	2	Bradford 2013
Effects of high-dose paracetamol on blood pressure in acute stroke	den Hertog HM; van der Worp HB; van Gemert HM; van Gijn J; Koudstaal PJ; Dippel DW	2012	Acta Neurologica Scandinavica	125		denHertog 2012
A randomized controlled trial to assess the psychosocial effects of early exercise engagement in patients diagnosed with transient ischaemic attack and mild, non-disabling stroke	Faulkner J; McGonigal G; Woolley B; Stoner L; Wong L; Lambrick D	2015	Clinical Rehabilitation	29	8	Faulkner 2015
The long-term effect of exercise on vascular risk factors and aerobic fitness in those with transient ischaemic attack: a randomized controlled trial	Faulkner J; Lambrick D; Woolley B; Stoner L; Wong LK; McGonigal G	2014	Journal of Hypertension	32	10	Faulkner 2014
Rosuvastatin may stabilize atherosclerotic aortic plaque: transesophageal echocardiographic study in the EPISTEME trial	Ueno Y; Yamashiro K; Tanaka Y; Watanabe M; Miyamoto N; Shimada Y; et al	2015	Atherosclerosis	329	2	Ueno 2015
The effect of a short-term exercise programme on haemodynamic adaptability; a randomised controlled trial with newly diagnosed transient ischaemic attack patients	Faulkner J; McGonigal G; Woolley B; Stoner L; Wong L; Lambrick D	2013	Journal of Human Hypertension	27		Faulkner 2013
A randomized trial investigating the influence of strength training on quality of life in ischemic stroke	Aidar FP; de Oliveira RJ; de Matos DG; Mazini Filho ML; Moreira OC; Patrocinio de Oliveira CE; et al	2016	Topics in Stroke Rehabilitation	23	2	Aidar 2016
Correction of post-stroke cognitive impairments using computer programs	Prokopenko SV; Mozheyko EY; Petrova MM; Koryagina TD; Kaskaeva DS; Chernykh TV; et al	2016	Journal of the Neurological Sciences	325	1	Prokopenko 2016
Contralateral needling at unblocked collaterals for hemiplegia following acute ischemic stroke	Gao H; Li X; Gao X; Ma B	2013	Neural Regeneration Research	8	31	Gao 2013
Dantrolene for cerebral vasospasm after subarachnoid haemorrhage: a randomised double blind placebo-controlled safety trial	Muehlschlegel S; Carandang R; Hall W; Kini N; Izzy S; Garland B; et al	2015	Journal of Neurology Neurosurgery and Psychiatry	86	9	Muehlschlegel 2015
Assessing and restoring cognitive functions early after stroke	Zucchella C; Capone A; Codella V; Vecchione C; Buccino G; Sandrini G; et al	2014	Functional Neurology	29	4	Zucchella 2014
Randomised controlled trial to evaluate the efficacy and usability of a computerised phone-based lifestyle coaching system for primary and secondary prevention of stroke	Spassova L; Vittore D; Droste DW; Rosch N	2016	BMC Neurology	16	22	Spassova 2016
Effect of high-dose simvastatin on cerebral blood flow and static autoregulation in subarachnoid hemorrhage	Diringer MN; Dhar R; Scalfani M; Zazulia AR; Chicoine M; Powers WJ; Derdeyn CP	2016	Neurocritical Care	25	1	Diringer 2016
Clinical efficacy and safety of edaravone therapy in acute cerebral haemorrhage	Yu M; Zhang DP; Ren YF; Zhang HT; Fu SQ; Zhang SL	2016	Tropical Journal of Pharmaceutical Research	15	9	Yu 2016
Early versus delayed rehabilitation treatment in hemiplegic patients with ischemic stroke: proprioceptive or cognitive approach?	Morreale M; Marchione P; Pili A; Lauta A; Castiglia SF; Spallone A; et al	2016	European Journal of Physical and Rehabilitation Medicine	52	1	Morreale 2016
Terutroban versus aspirin in patients with cerebral ischaemic events (PERFORM): a randomised, double-blind, parallel-group trial	Bousser, Marie-Germaine; Amarenco, Pierre; Chamorro, Angel; Fisher, Marc; Ford, Ian; Fox, Kim M; Hennerici, Michael G; Mattle, Heinrich P; Rothwell, Peter M; De CordoÃ¼e, AgnÃ¨s	2011	The Lancet	377	9782	Bousser 2011
Effectiveness and safety of transcranial laser therapy for acute ischemic stroke	Zivin, Justin A; Albers, Gregory W; Bornstein, Natan; Chippendale, Thomas; Dahlof, Bjorn; Devlin, Thomas; Fisher, Marc; Hacke, Werner; Holt, William; Ilic, Sanja	2009	Stroke	40	4	Zivin 2009
Neuroprotective effect of dapsone in patients with acute ischemic stroke: a pilot study	Nader-Kawachi, Juan; GÃ³ngora-Rivera, Fernando; Santos-Zambrano, JosÃ©; Calzada, Paloma; RÃ­os, Camilo	2007	Neurological research	29	3	Nader-Kawachi 2007
